# Supplementary material for: The value of arterial spin labelling in adults glioma grading: systematic review and meta-analysis
Source: PubMed Central journal article supplement (PMC6422184; doi:10.18632/oncotarget.26674), 2019-02-22
Supplement: oncotarget-10-1589-s001.pdf [file oncotarget-10-1589-s001.pdf]

# The value of arterial spin labelling in adults glioma grading: systematic review and meta-analysis

## SUPPLEMENTARY MATERIALS

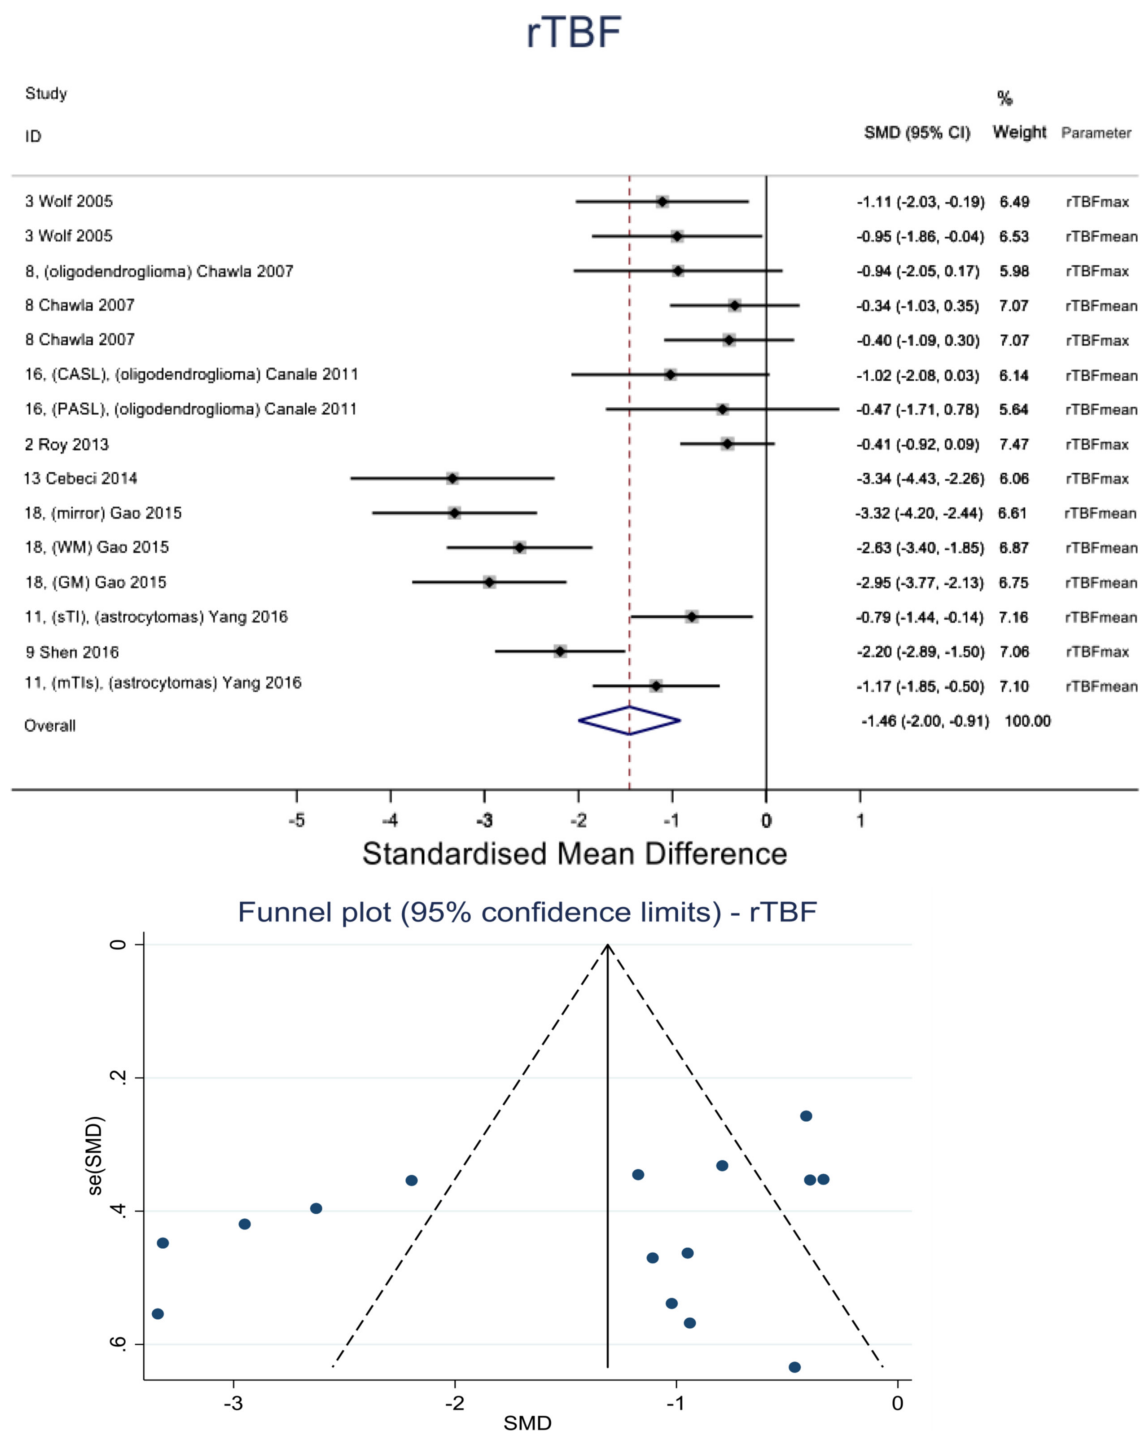

**Supplementary Figure 1: rTBF for LGG patients' relative to the value for HGG patients'.** In the forest plot, the dotted vertical line represents the pooled effect size point where the effect size in individual studies have very different distribution (heterogeneity) around this line. The pooled effect and their 95% CI (the diamond at the bottom) express that the LGG have significantly lower rTBF than the HGG (-1.46, (-2.00, -0.91)). The funnel plot is symmetric and does not show publication bias.

## rTBF mean

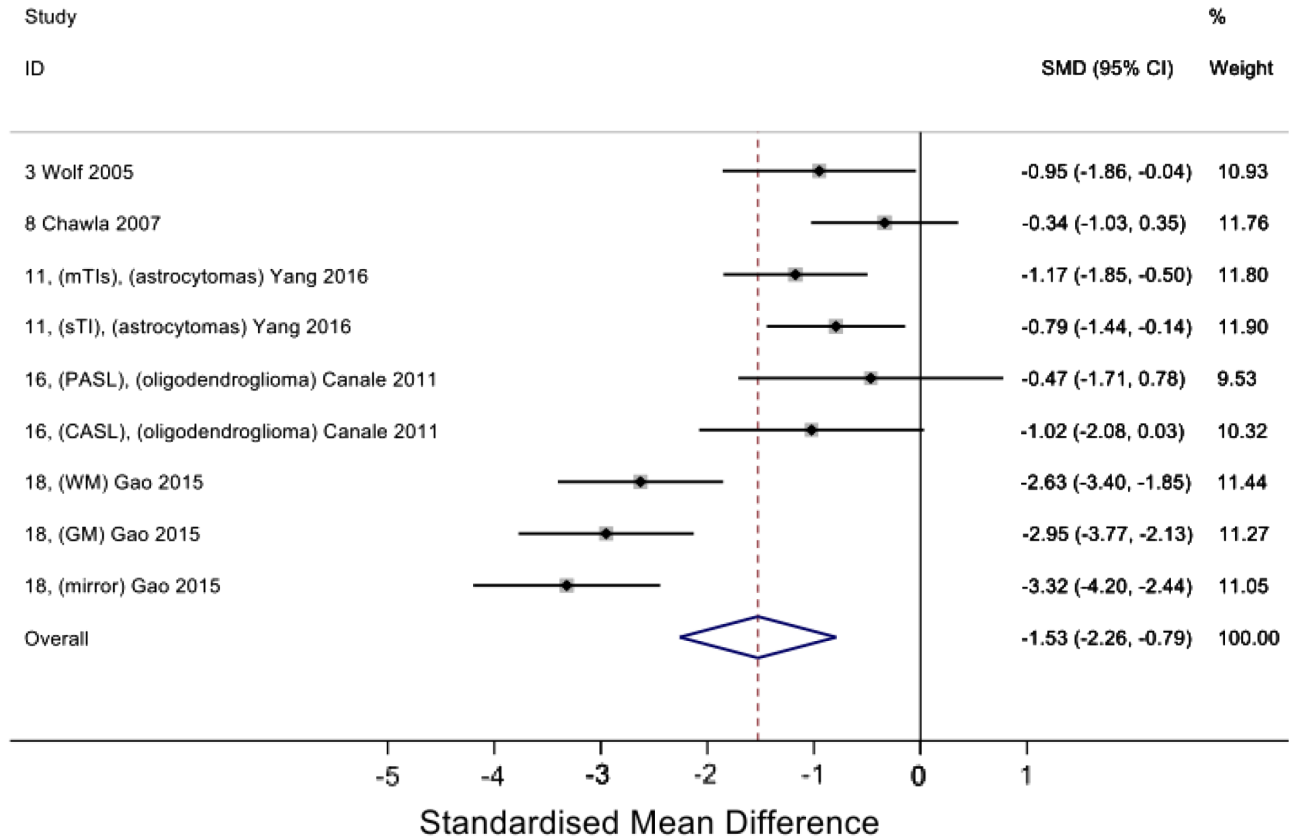

Funnel plot (95% confidence limits) - rTBF mean

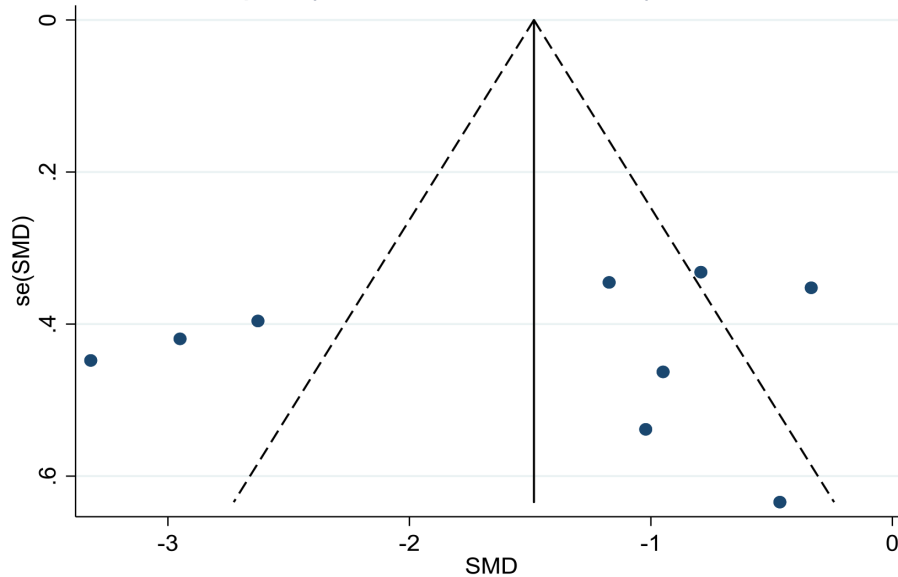

**Supplementary Figure 2: rTBF-mean for LGG patients relative to the value for HGG patients.** In the forest plot, the dotted vertical line represents the pooled effect size point where the effect size in individual studies have very different distribution (heterogeneity) around this line. The pooled effect and their 95% CI (the diamond at the bottom) express that the LGG have significantly lower rTBFmean than the HGG (-1.53, (-2.26, -0.79)). The funnel plot is symmetric and does not show publication bias.

## rTBF max

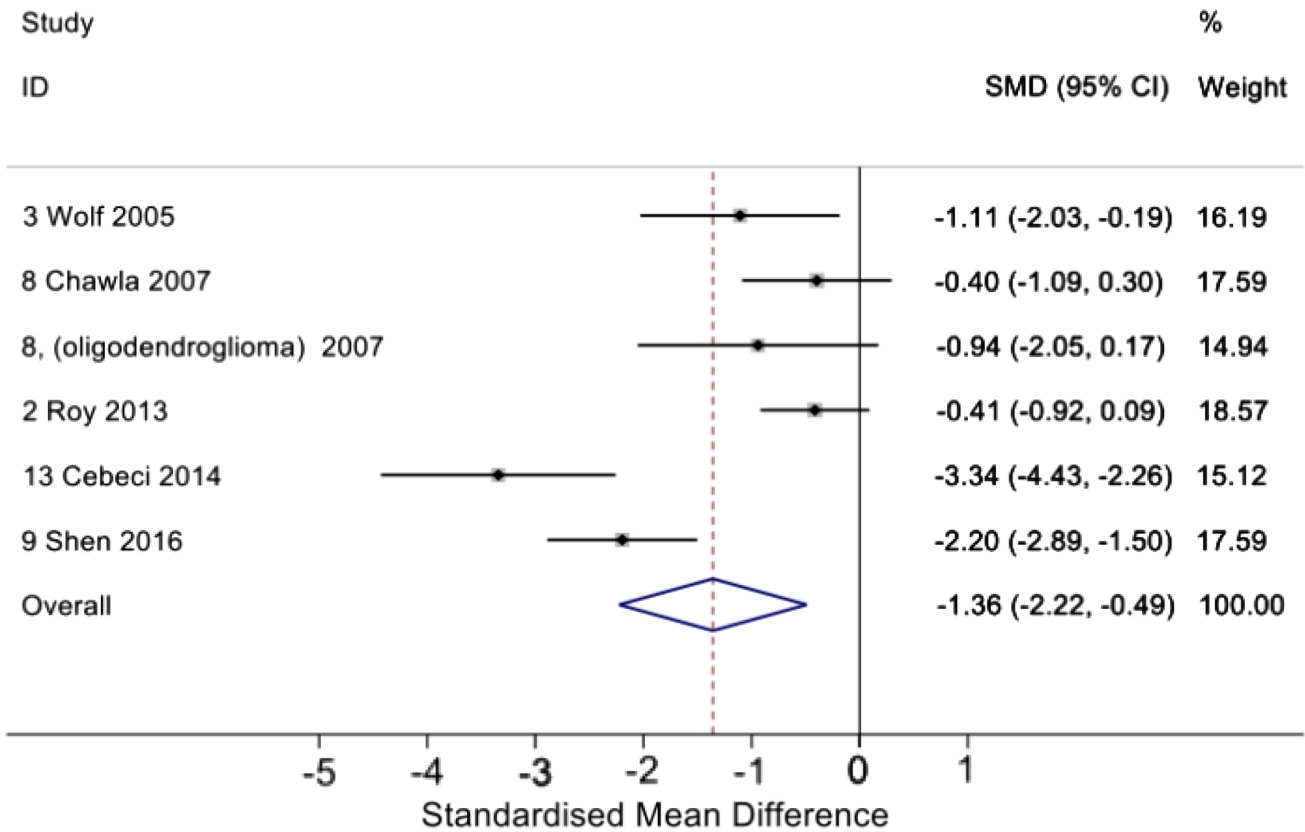

Funnel plot (95% confidence limits) - rTBF max

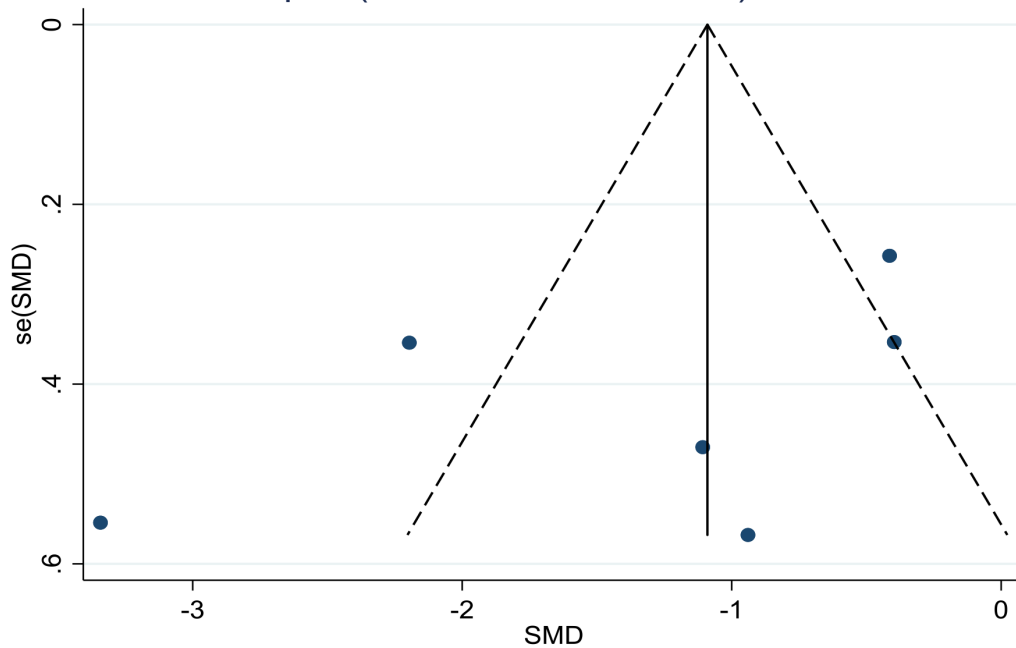

**Supplementary Figure 3: rTBF-max for LGG patients' relative to the value for HGG patients'.** In the forest plot, the dotted vertical line represents the pooled effect size point where the effect size in individual studies have very different distribution (heterogeneity) around this line. The pooled effect and their 95% CI (the diamond at the bottom) express that the LGG have significantly lower rTBFmax than the HGG (-1.36, (-2.23, -0.49)). The funnel plot is symmetric and does not show publication bias.

# TBF

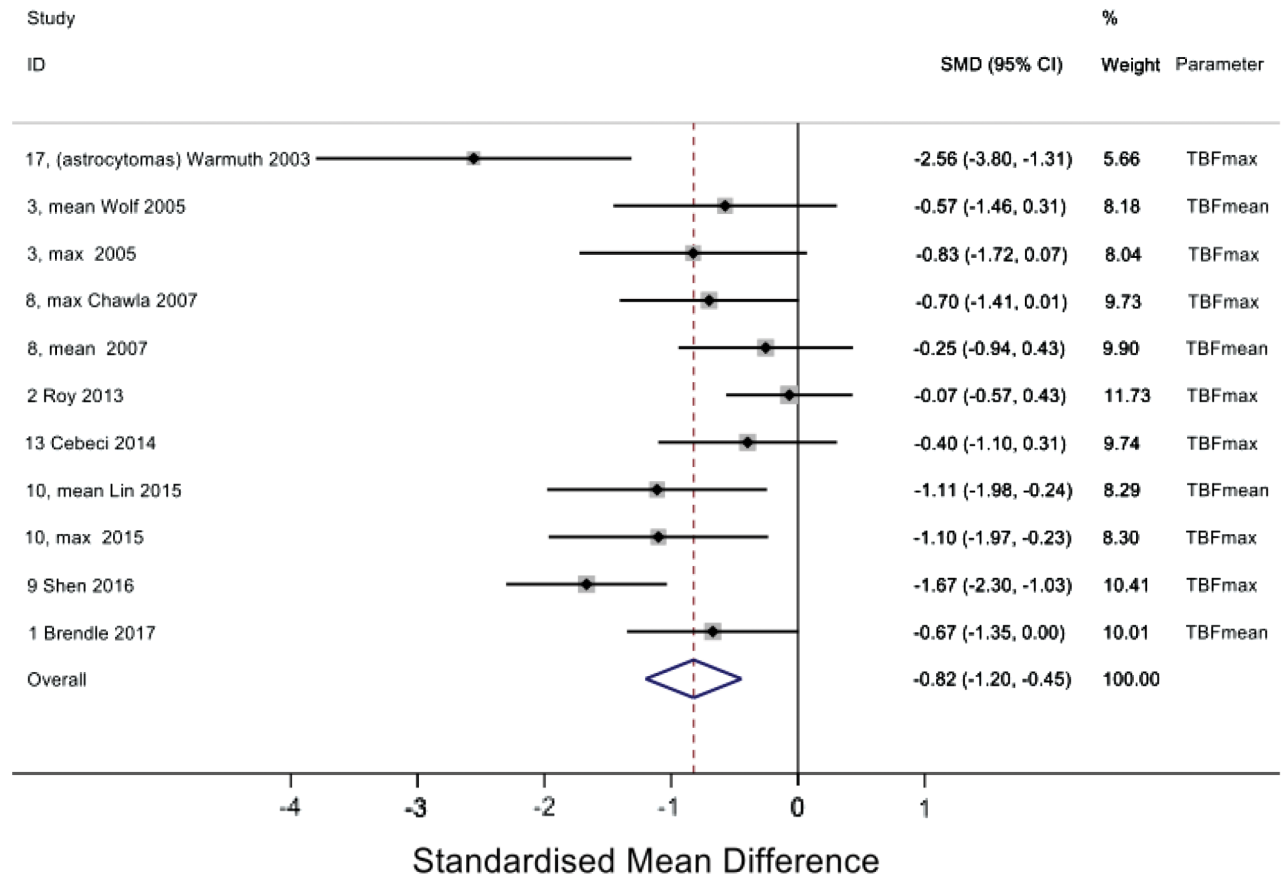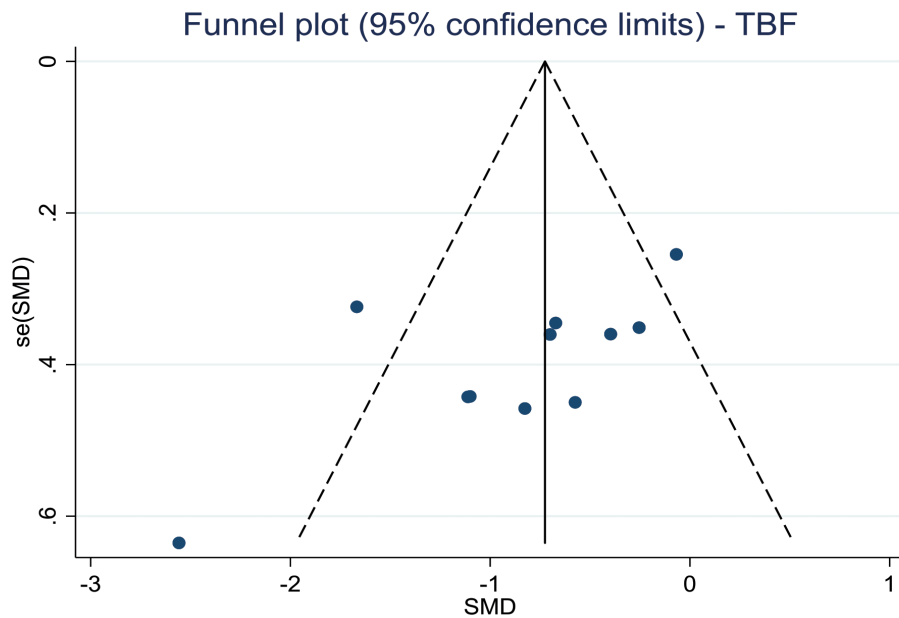

**Supplementary Figure 4: TBF for LGG patients' relative to the value for HGG patients'.** In the forest plot, the dotted vertical line represents the pooled effect size point where the effect size in individual studies have very different distribution (heterogeneity) around this line. The pooled effect and their 95% CI (the diamond at the bottom) express that the LGG have significantly lower TBF than the HGG ( $-0.82, (-1.20, -0.45)$ ). The funnel plot is symmetric and does not show publication bias.

## TBF mean

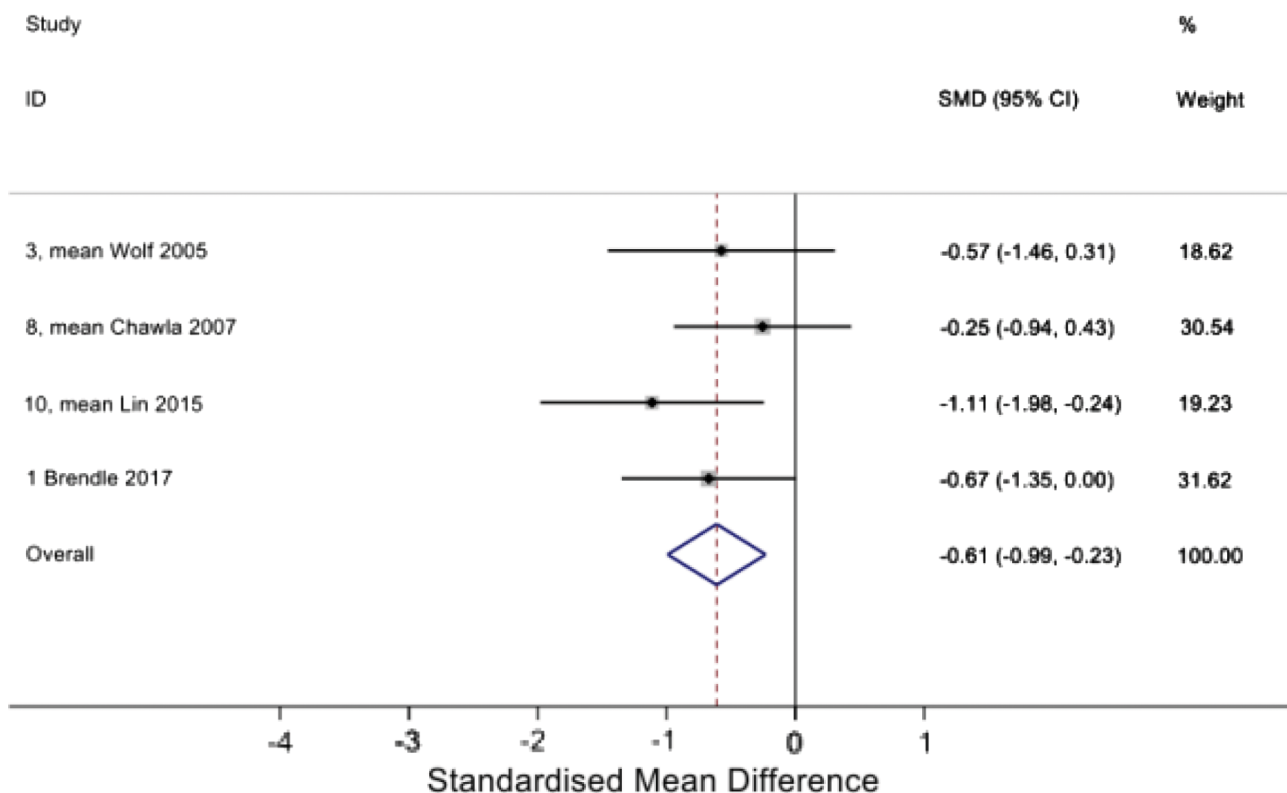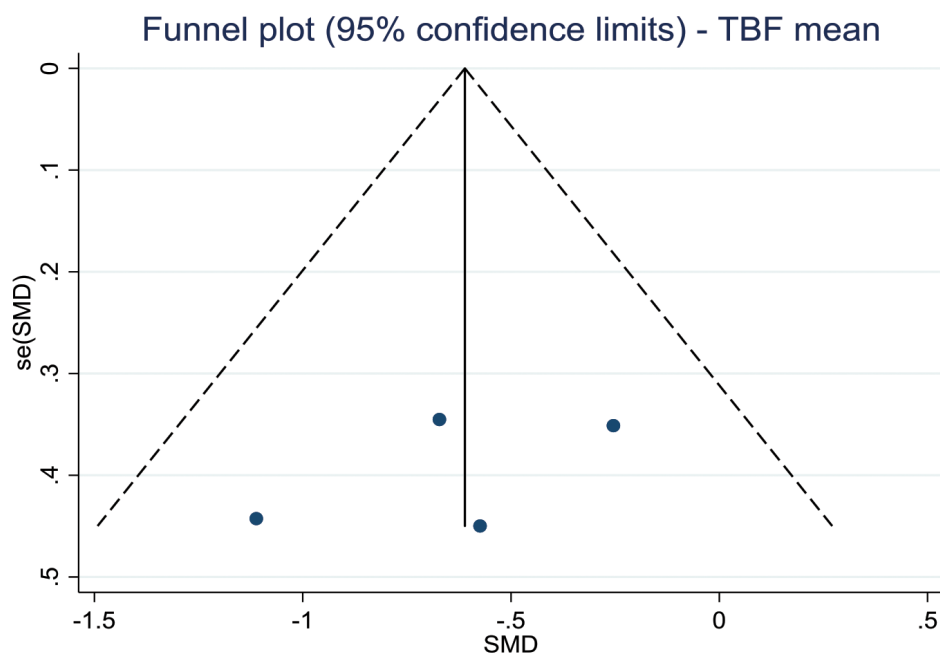

**Supplementary Figure 5: TBFmean for LGG patients' relative to the value for HGG patients'.** In the forest plot, the dotted vertical line represents the pooled effect size point where the effect size in individual studies have small distribution around this line with small degree of heterogeneity. The pooled effect and their 95% CI (the diamond at the bottom) express that the LGG have significantly lower TBFmean than the HGG (-0.61, (-0.99, -0.23)). The funnel plot is symmetric and does not show publication bias.

## TBF max

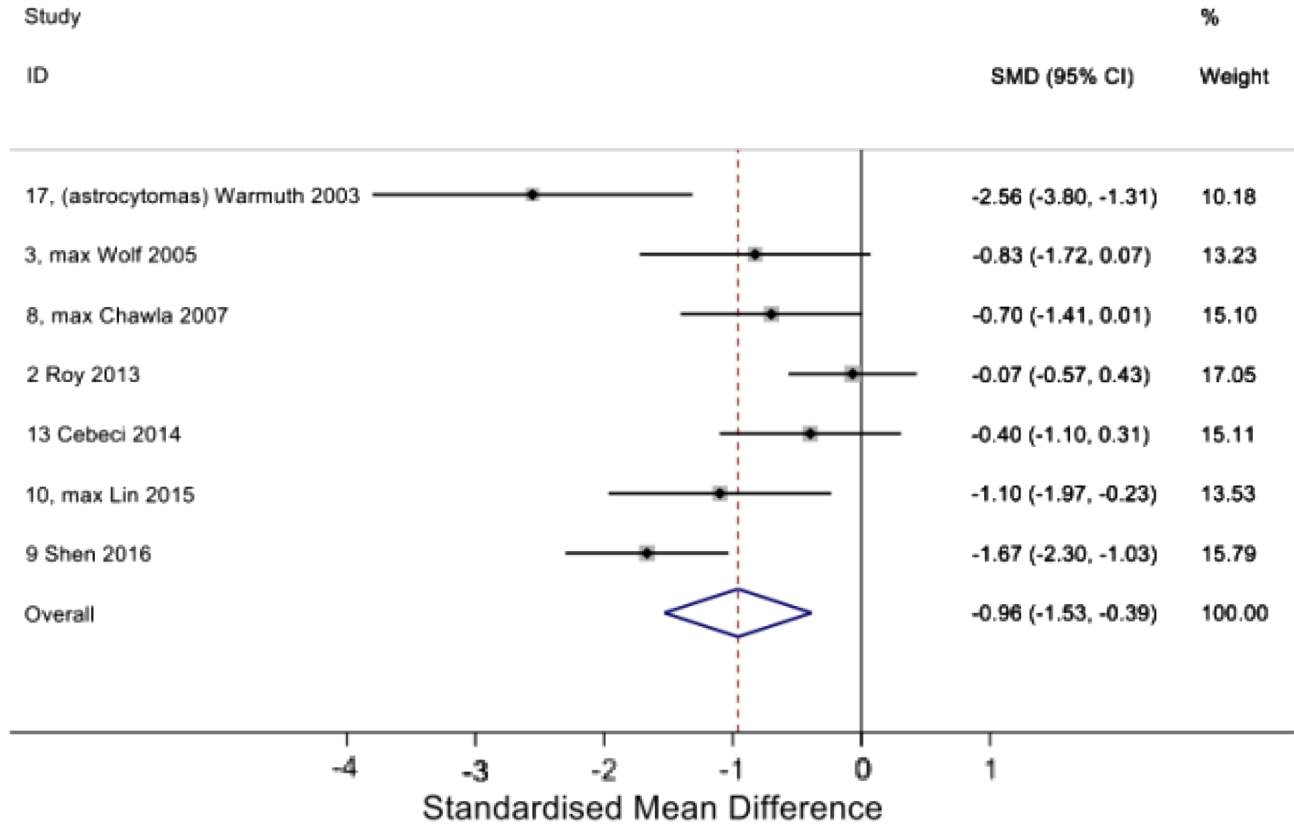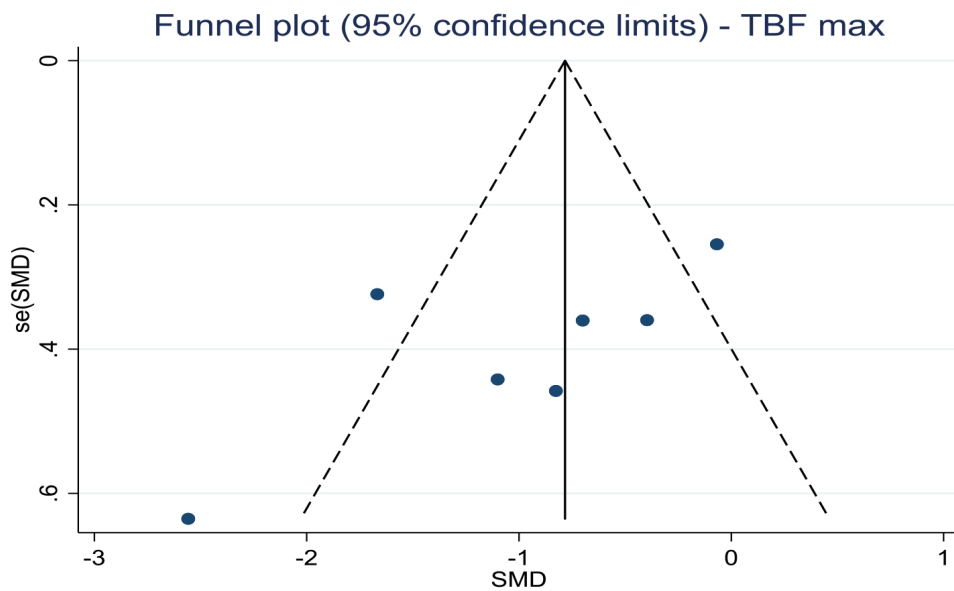

**Supplementary Figure 6: TBFmax for LGG patients' relative to the value for HGG patients'.** In the forest plot, the dotted vertical line represents the pooled effect size point where the effect size in individual studies have very different distribution (heterogeneity) around this line. The pooled effect and their 95% CI (the diamond at the bottom) express that the LGG have significantly lower TBFmax than the HGG ( $-0.96, (-1.53, -0.39)$ ). The funnel plot is symmetric and does not show publication bias.

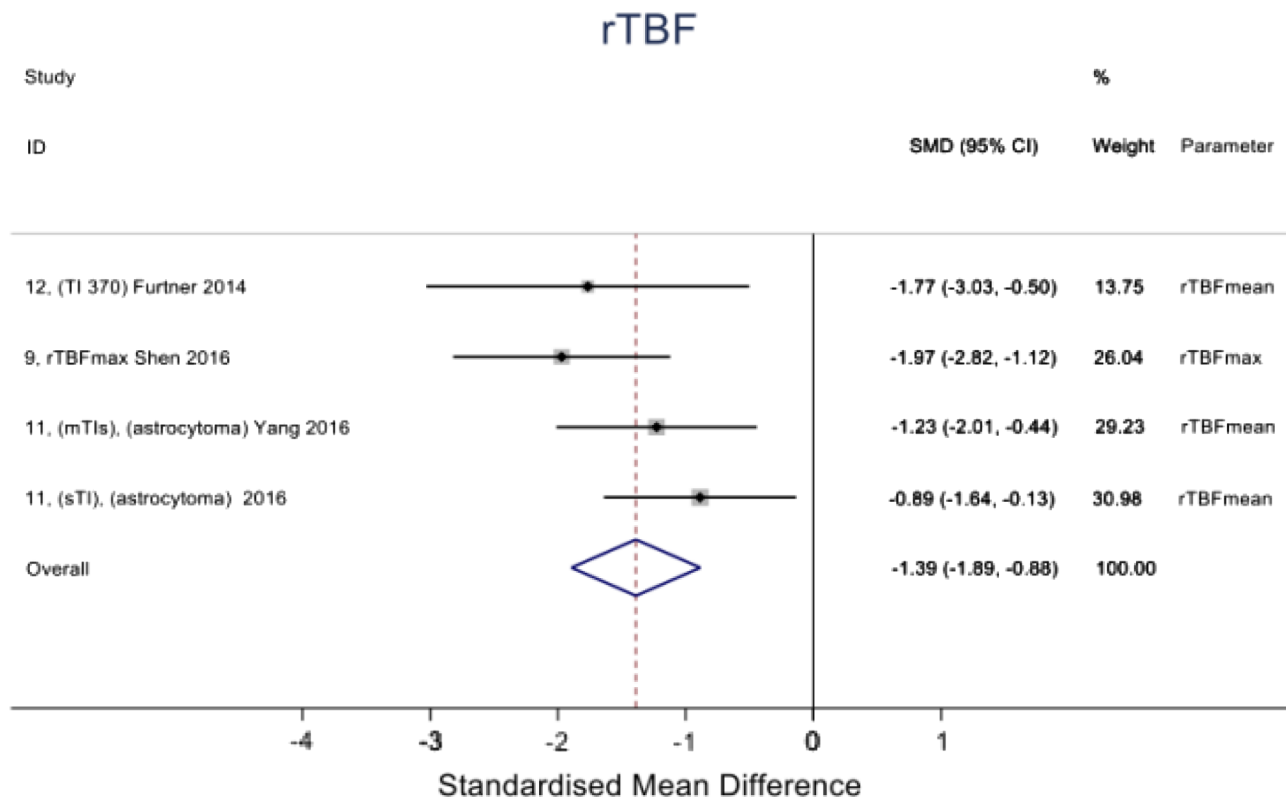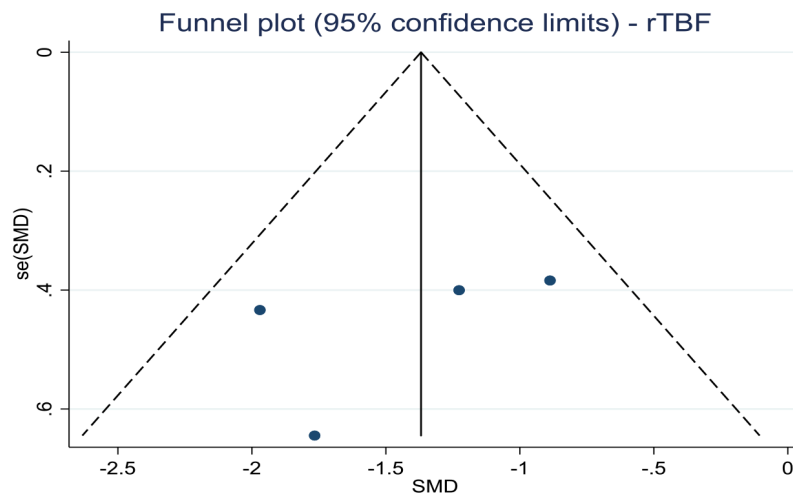

**Supplementary Figure 7: rTBF for grade-II patients' relative to the value for grade-III patients'.** In the forest plot, the dotted vertical line represents the pooled effect size point where the effect size in individual studies have low distribution (small heterogeneity degree) around this line. The pooled effect and their 95% CI (the diamond at the bottom) express that the grade-II rTBF value about significantly lower than the that of the grade-III (-1.39, (-1.89, -0.89)). The funnel plot is symmetric and does not show publication bias.

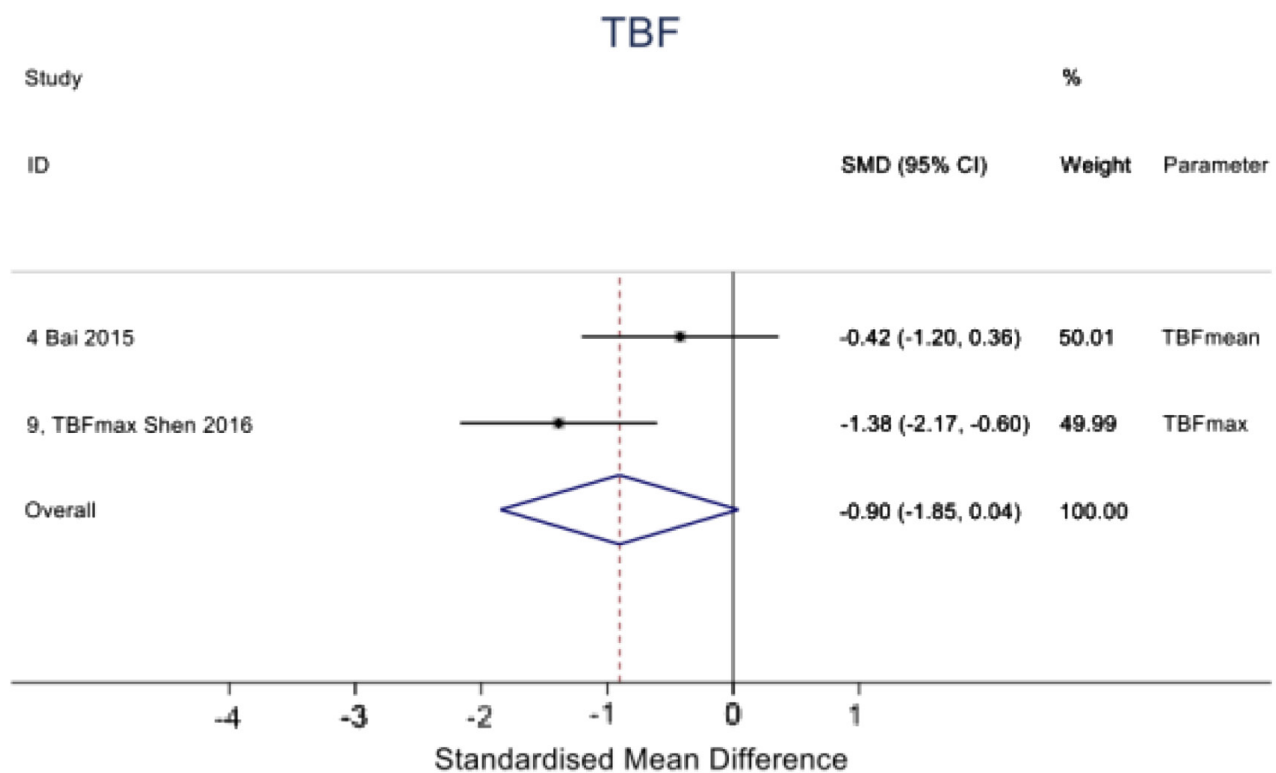

**Supplementary Figure 8: TBF for grade-II patients' relative to the value for grade-III patients'.** In the forest plot, the dotted vertical line represents the pooled effect size point where the effect size in individual studies have moderate distribution (moderate heterogeneity degree) around this line. The pooled effect and their 95% CI (the diamond at the bottom) express that the grade-II has approximately significant lower TBF value than the grade-III (-0.90, (-1.85, 0.04)). The funnel plot cannot be produced due to the small study number.



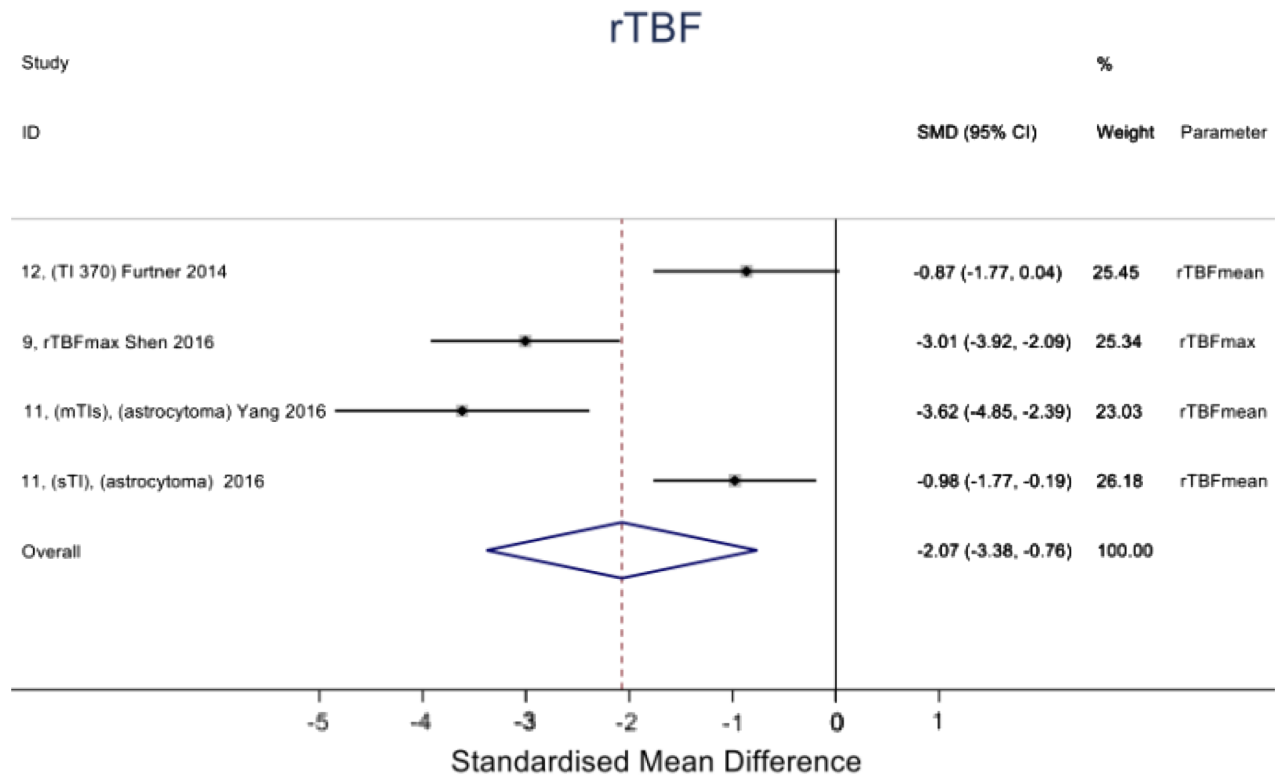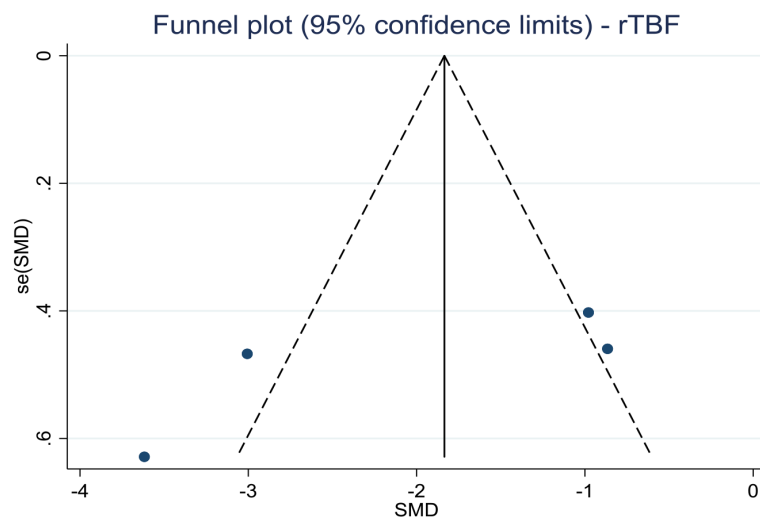

**Supplementary Figure 9: rTBF for grade-II patients' relative to the value for grade-IV patients'.** In the forest plot, the dotted vertical line represents the pooled effect size point where the effect size in individual studies have very large distribution (heterogeneity) around this line. The pooled effect and their 95% CI (the diamond at the bottom) express that the grade-II rTBF value was significantly lower than the that of the grade-IV (-2.07, (-3.38, -0.76)). The funnel plot is symmetric and does not show publication bias.

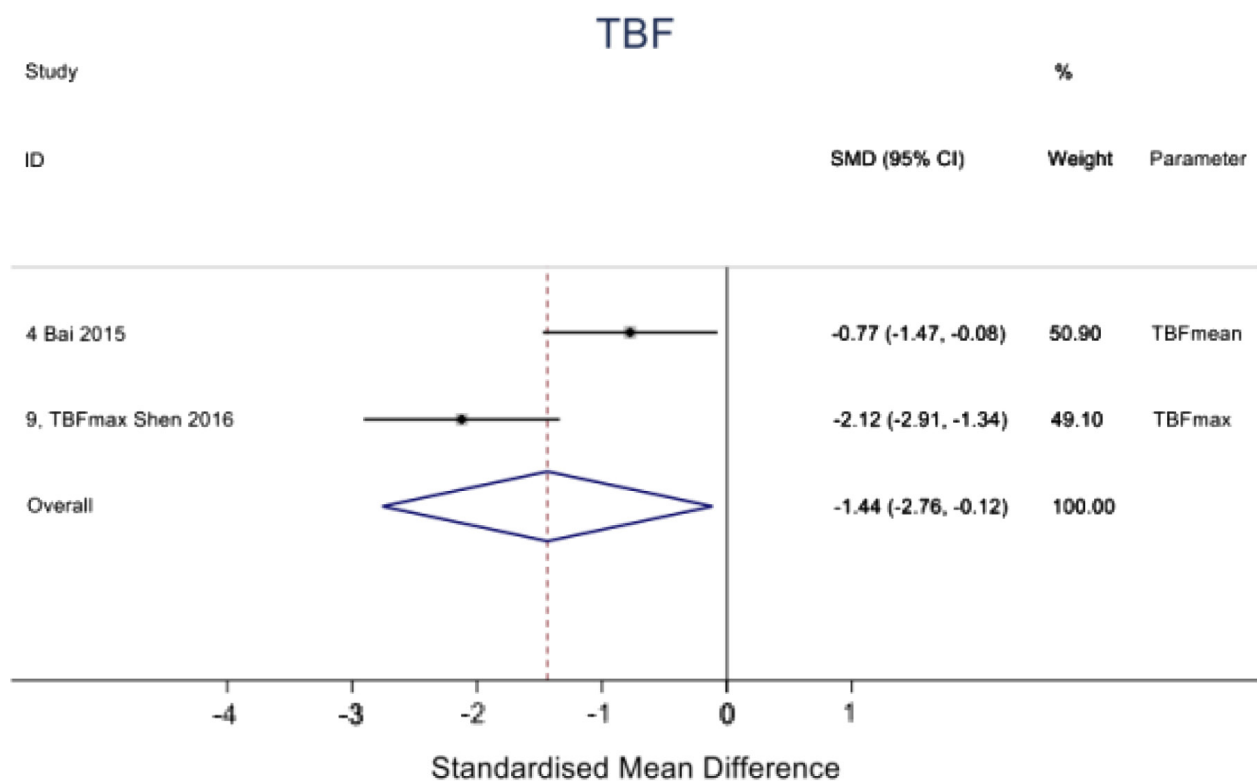

**Supplementary Figure 10: TBF for grade-II patients' relative to the value for grade-IV patients'.** In the forest plot, the dotted vertical line represents the pooled effect size point where the effect size in individual studies represent very large distribution (heterogeneity) around this line. The pooled effect and their 95% CI (the diamond at the bottom) express that the grade-II significantly lower TBF value than the grade-IV (-1.44, (-2.76, -0.12)). The funnel plot cannot be produced due to the small study number.

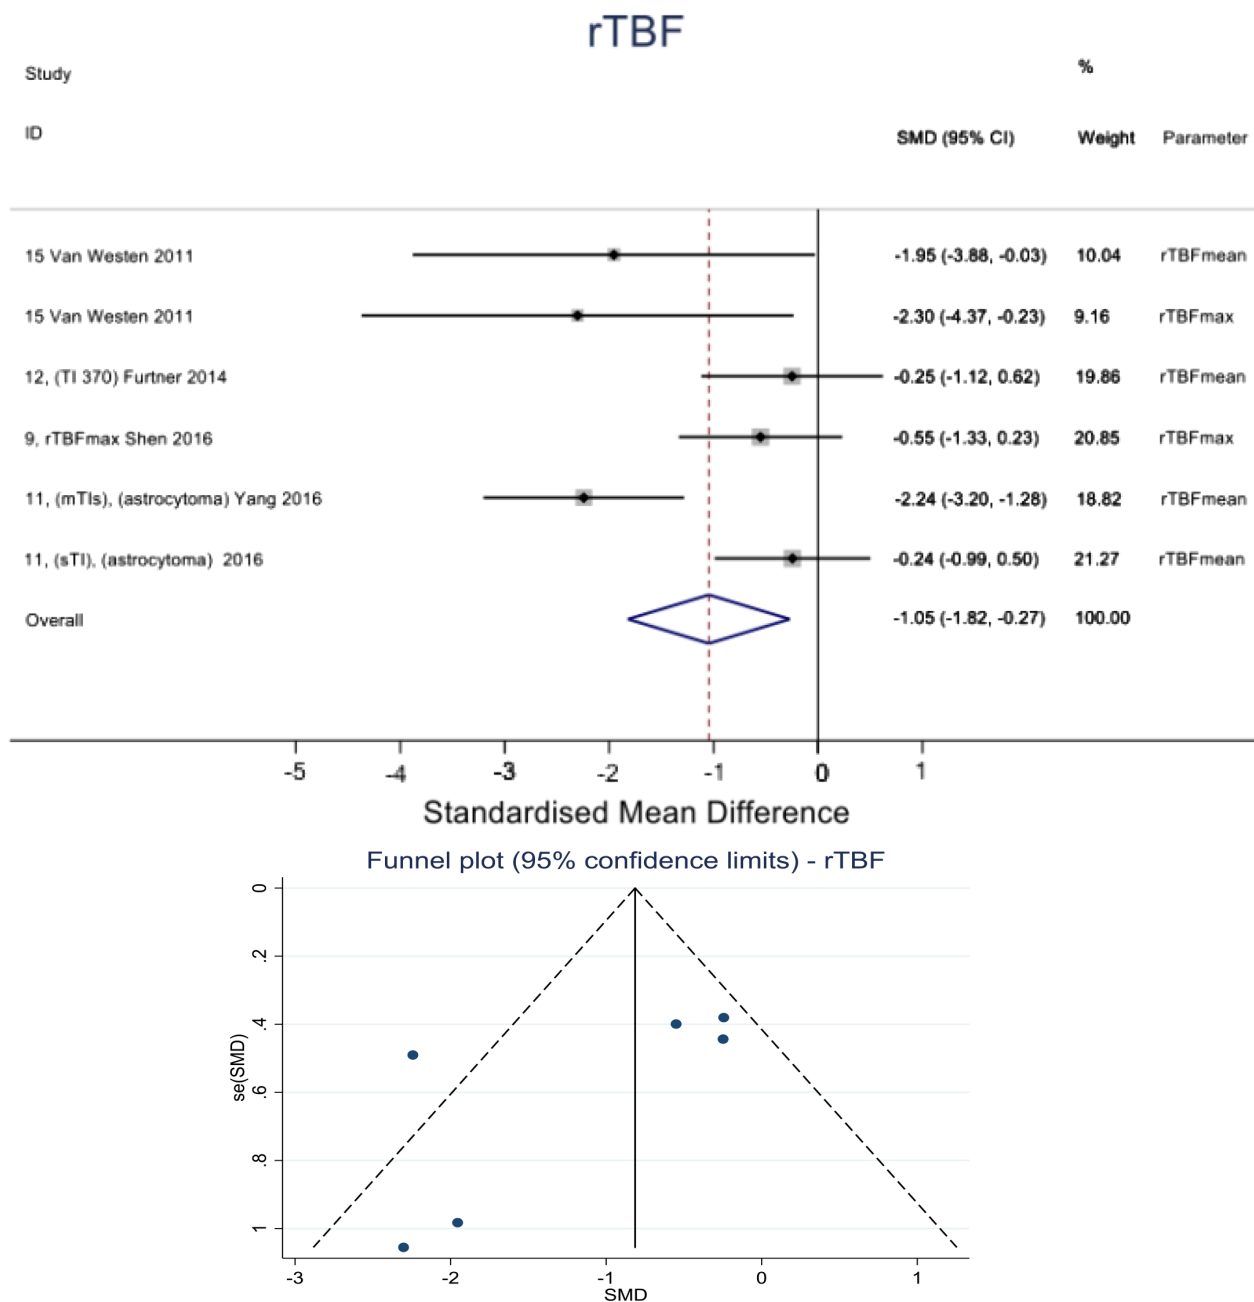

**Supplementary Figure 11: rTBF for grade-III patients' relative to the value for grade-IV patients'.** In the forest plot, the dotted vertical line represents the pooled effect size point where the effect size in individual studies have large distribution (heterogeneity) around this line. The pooled effect and their 95% CI (the diamond at the bottom) express that the grade-III significantly has lower rTBF value than the grade-IV (-1.05, (-1.82, -0.27)). The funnel plot is symmetric and does not show publication bias.

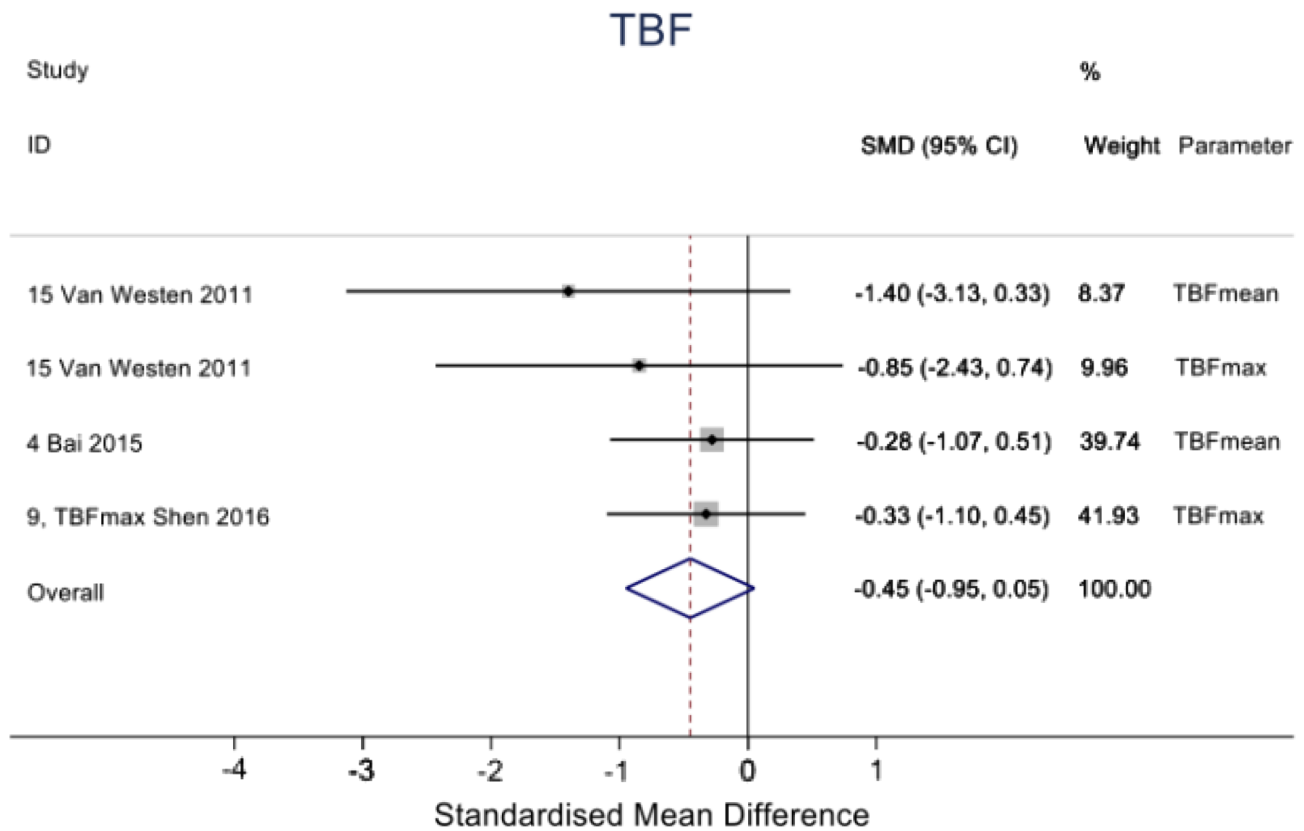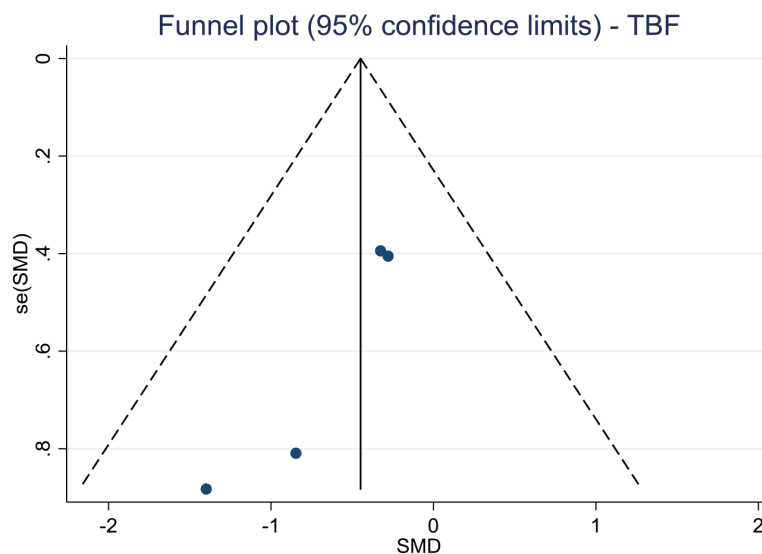

**Supplementary Figure 12: TBF for grade-III patients' relative to the value for grade-IV patients'.** In the forest plot, the dotted vertical line represents the pooled effect size point where the effect size in individual studies have low distribution (small heterogeneity degree) around this line. The pooled effect and their 95% CI (the diamond at the bottom) express a trend of lower rTBF value in grade-III than in grade-IV (-0.45, (-0.95, 0.05)). The funnel plot is asymmetric and does show publication bias.

## Supplementary Table 1: Studies performed using PCASL

| Study no. | Authors         | Publication year | Country of origin | Gliomas type<br>Oligodendrogliomas/<br>astrocytomas/mixed | LGGs                                                                     |                                         | HGGs                                                                                         |          | Histologic analysis obtained with | Study design | MRI field strength | 2D/3D | Bolus width (ms) | TI/PLD (ms) | Examined perfusion metrics         | Significance for differentiation between HGGs and LGGs                                                                                         |
|-----------|-----------------|------------------|-------------------|-----------------------------------------------------------|--------------------------------------------------------------------------|-----------------------------------------|----------------------------------------------------------------------------------------------|----------|-----------------------------------|--------------|--------------------|-------|------------------|-------------|------------------------------------|------------------------------------------------------------------------------------------------------------------------------------------------|
|           |                 |                  |                   |                                                           | Grade I                                                                  | Grade II                                | Grade III                                                                                    | Grade IV |                                   |              |                    |       |                  |             |                                    |                                                                                                                                                |
| 2[1]      | Roy, B. et al.  | 2013             | India             | indistinct                                                | 3                                                                        | 23                                      | 9 astrocytoma                                                                                | 29 GBM   | NA                                | prospective  | 3T                 | 3D    | 1450             | 1525        | TBFmax<br>rTBFmax                  | $P = 0.78$<br>$P = 0.12$                                                                                                                       |
| 4[2]      | Bai, Y. et al.  | 2015             | USA               | mixed                                                     | NA                                                                       | 18(13 astrocytoma, 2 oligodendroglioma) | 10(5 anaplastic astrocytoma, 2 anaplastic oligodendroglioma, 3 anaplastic oligo-astrocytoma) | 16 GBM   | Surgical resection                | prospective  | 3T                 | 3D    | 2025             | 1525        | TBFmean<br>TBFmax                  | Grade-II / III, $p = 0.874$<br>Grade-II / IV, $p = 0.023$<br>Grade-III/ IV, $p = 0.213$<br>$P < 0.001$ , including sub-grading ( $P < 0.001$ ) |
| 9[3]      | Shen, N. et al. | 2016             | China             | mixed                                                     | 25 (19 astrocytoma, 6 oligodendroglioma)                                 |                                         | 27 (10 anaplastic astrocytoma, 1 anaplastic oligodendroglioma, 16 GBM)                       |          | NA                                | prospective  | 3T                 | 3D    | 1500             | 1525        | rTBFmax                            | $P < 0.001$ , including sub-grading ( $P < 0.001$ )                                                                                            |
| 10[4]     | Lin, Y. et al.  | 2015             | China             | mixed                                                     | 11 (7 diffuse astrocytoma, 3 oligodendroglioma, 1 capillary astrocytoma) |                                         | 8 anaplastic astrocytoma                                                                     | 5 GBM    |                                   | prospective  | 3T                 | 3D    | Not mentioned    | 1500        | TBFmean<br>TBFmax<br>rTBFmean (WM) | $P = 0.011$<br>$P = 0.002$<br>$P < 0.001$                                                                                                      |
| 18[5]     | Gao, F. et al.  | 2015             | China             | indistinct                                                | 28                                                                       |                                         | 21                                                                                           |          | NA                                | prospective  | 3T                 | 2D    | Not mentioned    | 1400        | rTBFmean (GM)<br>rTBFmean (mirror) | $P < 0.001$<br>$P < 0.001$                                                                                                                     |

<sup>1</sup>study 18 did not mentioned the used ASL labelling method. Not available (NA).

## Supplementary Table 2: Studies performed using CASL

| Study no. | Author            | Publication year | Country of origin | Gliomas type<br>Oligodendrogliomas/<br>astrocytomas/mixed | LGGs          |                                                            | HGGs                                                                                        |          | Histologic analysis obtained with | Study design  | MRI field strength | 2D/3D | Bolus width (ms) | TI/PLD (ms) | Examined perfusion metrics                         | Significance for differentiation between HGGs and LGGs             |
|-----------|-------------------|------------------|-------------------|-----------------------------------------------------------|---------------|------------------------------------------------------------|---------------------------------------------------------------------------------------------|----------|-----------------------------------|---------------|--------------------|-------|------------------|-------------|----------------------------------------------------|--------------------------------------------------------------------|
|           |                   |                  |                   |                                                           | Grade I       | Grade II                                                   | Grade III                                                                                   | Grade IV |                                   |               |                    |       |                  |             |                                                    |                                                                    |
| 3[6]      | Wolf, R. et al.   | 2005             | USA               | mixed                                                     | 2 (ganglioma) | 5 (1 oligodendroglioma, 1 astrocytoma, 3 oligoastrocytoma) | 8 (1 anaplastic oligodendroglioma, 4 anaplastic astrocytoma, 3 anaplastic oligoastrocytoma) | 11 GBM   | NA                                | NA            | 3T                 | 2D    | 2000             | 1200        | TBFmean<br>TBFmax<br>rTBFmean<br>rTBFmax<br>TBFmax | $P = 0.39$<br>$P = 0.04$<br>$P = 0.06$<br>$P = 0.01$<br>$P < 0.05$ |
| 8[7]      | Chawla, S. et al. | 2007             | USA               | mixed                                                     | 1 gabglioma   | 12 (1 astrocytoma, 11 oligodendroglioma)                   | 9 (4 astrocytoma, 5 oligodendroglioma)                                                      | 13 GBM   | NA                                | retrospective | 3T                 | 3D    | 2000             | 1200        | TBFmean<br>rTBFmean                                | $P > 0.05$<br>$P > 0.05$                                           |
|           |                   |                  |                   | Oligodendrogliomas                                        |               |                                                            |                                                                                             |          |                                   |               |                    |       |                  | rTBFmax     | $P > 0.05$                                         |                                                                    |
| 16[8]     | Canale, S. et al. | 2011             | France            | indistinct                                                | NA            | 5 oligodendroglioma                                        | 11 (9 oligodendroglioma, 2 TGNM)                                                            | 5 GBM    | NA                                | retrospective | 1.5T               | 3D    | Not mentioned    | 1200        | rTBFmean                                           | yes                                                                |

Not available (NA).

### Supplementary Table 3: Studies performed using PASL

| Study no. | Author             | Publication year | Country of origin | Gliomas type<br>Oligodendrogliomas/<br>astrocytomas/mixed | LGGs    |                                                                                                     | HGGs                                                                             |                                                                             |     |                                | Histologic analysis obtained with | Study design  | PASL approach | MRI field strength | 2D/3D         | Bolus width (ms) | TI/PLD (ms)                              | Examined for perfusion metrics                                                                        | Significance for differentiation between HGGs and LGGs |
|-----------|--------------------|------------------|-------------------|-----------------------------------------------------------|---------|-----------------------------------------------------------------------------------------------------|----------------------------------------------------------------------------------|-----------------------------------------------------------------------------|-----|--------------------------------|-----------------------------------|---------------|---------------|--------------------|---------------|------------------|------------------------------------------|-------------------------------------------------------------------------------------------------------|--------------------------------------------------------|
|           |                    |                  |                   |                                                           | Grade I | Grade II                                                                                            | Grade III                                                                        | Grade IV                                                                    |     |                                |                                   |               |               |                    |               |                  |                                          |                                                                                                       |                                                        |
| 1[9]      | Cornelia B. et al. | 2017             | Germany           | mixed                                                     | NA      | 20 (7 oligodendroglioma II, 14 astrocytoma II)                                                      | 11 (2 oligodendroglioma III, 9 astrocytoma III)                                  | 5                                                                           | GBM | NA                             | retrospective                     | PICORE        | 3T            | 2D                 | 700           | 1800             | TBFmean                                  | $P = 0.1030$                                                                                          |                                                        |
| 5[10]     | Kim, H.S. et al.   | 2007             | Korea             | indistinct                                                | NA      | 11                                                                                                  | 7                                                                                | 15                                                                          |     | Surgery or stereotactic biopsy | prospective                       | FAIR          | 1.5T          | 2D                 | indistinct    | 1200             | ROC-analysis                             | indistinct                                                                                            |                                                        |
| 6[11]     | Weber, M. et al.   | 2006             | Germany           | indistinct                                                | NA      | 9                                                                                                   | 11 anaplastic gliomas                                                            | 35                                                                          | GBM | stereotactic biopsy            | prospective                       | Not mentioned | 1.5           | 2D                 | 1000          | 1200             | ROC-analysis                             | indistinct                                                                                            |                                                        |
| 7[12]     | Fudaba, H. et al.  | 2014             | Japan             | Both Mix and astrocytomas                                 | NA      | 9 (3 diffuse astrocytoma, 3 oligodendroglioma and 3 oligoastrocytoma)                               | 8 (3 anaplastic astrocytoma, 4 anaplastic oligodendroglioma, 1 oligoastrocytoma) | 15 (14 GBM, 1 GBM with oligodendroglioma component)                         |     | Surgery or stereotactic biopsy | retrospective                     | Not mentioned | 3T            | 2D                 | Not mentioned | 1800             | ROC-analysis                             | indistinct                                                                                            |                                                        |
| 11[13]    | Yang, X. et al.    | 2016             | China             | astrocytomas                                              | NA      | 15 diffuse astrocytoma                                                                              | 15 anaplastic astrocytoma                                                        | 13                                                                          | GBM | NA                             | prospective                       | FAIR          | 3T            | 3D                 | 700           | 1920             | rTBFmean (sTI)                           | HGG vs LGG, $P = 0.003$<br>II vs III, $P = 0.098$<br>II vs IV, $P = 0.006$<br>III vs IV, $P = 0.0905$ |                                                        |
| 12[14]    | Furtner, J. et al. | 2014             | Austria           | astrocytomas                                              | NA      | 7 (diffuse astrocytoma)                                                                             | 7 (anaplastic astrocytoma)                                                       | 19                                                                          | GBM | Surgery or stereotactic biopsy | prospective                       | PICORE        | 3T            | 2D                 | Not mentioned | 370              | rTBFmean                                 | $P = 0.003$                                                                                           |                                                        |
| 13[15]    | Cebeci, H. et al.  | 2014             | Turkey            | mixed                                                     | NA      | 13 (11 oligodendroglioma, 1 disemryoblastic neuroepithelial tumour (DNET), 1 pilocytic astrocytoma) | 20 (18 GBM, 1 astrocytoma, 1 gliosarcoma)                                        |                                                                             |     | NA                             | retrospective                     | EPISTAR       | 3T            | 2D                 | Not mentioned | Not mentioned    | rTBFmax                                  | $P < 0.001$                                                                                           |                                                        |
| 14[16]    | Kim, M. J. et al.  | 2008             | Korea             | astrocytomas                                              | NA      | 26                                                                                                  | 12 anaplastic astrocytomas                                                       | 23                                                                          | GBM | Surgery or stereotactic biopsy | prospective                       | FAIR          | 1.5T          | 2D                 | Not mentioned | 1200             | rTBFmax                                  | $P < 0.05$                                                                                            |                                                        |
| 15[17]    | Van, W. et al.     | 2011             | Sweden            | indistinct                                                | NA      | NA                                                                                                  | 3                                                                                | 4                                                                           |     | Biopsy proven                  | NA                                | QUASAR        | 3T            | 2D                 | Not mentioned | Not mentioned    | TBFmax<br>TBFmean<br>rTBFmax<br>rTBFmean | Just mentioned the trend of increasing the TBF from grade-III towards grade-IV                        |                                                        |
| 16[8]     | Canale, S. et al.  | 2016             | France            | indistinct                                                | NA      | 3 oligodendroglioma                                                                                 | 12 (9 oligodendroglioma III, 3 TGNM)                                             | 4                                                                           | GBM | NA                             | retrospective                     | Not mentioned | 1.5T          | 2D                 | Not mentioned | 1200             | rTBFmean                                 | Using PASL, $P > 0.05$<br>Using CASL, $P < 0.05$                                                      |                                                        |
| 17[18]    | Warmuth, C. et al. | 2003             | Germany           | mixed                                                     | NA      | 3 (2 ganglioma, 1 pleomorphic xanthoastrocytoma)                                                    | 6 (5 astrocytoma, 1 optic astrocytoma)                                           | 3 (1 anaplastic oligodendroglioma, 1 anaplastic astrocytoma, 1 astrocytoma) | 7   | GBM                            | prospective                       | FAIR          | 1.5T          | 2D                 | 1200          | 1300             | rTBFmax                                  | $P < 0.001$                                                                                           |                                                        |

Not available (NA); Proximal Inversion with Control of Off-Resonance Effects (PICORE); flow alternating inversion recovery (FAIR); quantitative STAR labeling of arterial regions (QUASAR).

**Supplementary Table 4: Sensitivity, specificity, negative predictive values (NPV) and positive predictive values (PPV) of published ASL-derived biomarkers cut-off values for glioma grading**

| <b>II vs III gliomas</b> |                                   |                       |                |                    |                    |                                |             |             |
|--------------------------|-----------------------------------|-----------------------|----------------|--------------------|--------------------|--------------------------------|-------------|-------------|
| <b>Author/year</b>       | <b>Study No.</b>                  | <b>ASL parameters</b> | <b>Cut-off</b> | <b>Sensitivity</b> | <b>Specificity</b> | <b>Prevalence of grade III</b> | <b>PPV</b>  | <b>NPV</b>  |
| Weber, M A. et al.; 2006 | 6                                 | rTBFmean              | 1              | 0.92               | 0.33               | 0.55                           | 62.66       | 77.14       |
| Shen, N. et al.; 2016    | 9                                 | TBFmax                | 43.62          | 1                  | 0.69               | 0.31                           | 59.12       | 100         |
| Yang, X. et al.; 2016    | 11, (multiple TIs), (astrocytoma) | rTBFmean              | 2.43           | 1                  | 0.51               | 0.5                            | 67.11       | 100         |
|                          | 11, (single TI), (astrocytoma)    | rTBFmean              | 1.88           | 0.78               | 0.73               | 0.5                            | 74.29       | 76.84       |
| <b>II vs IV gliomas</b>  |                                   |                       |                |                    |                    |                                |             |             |
| <b>Author/year</b>       | <b>Study No.</b>                  | <b>ASL parameters</b> | <b>Cut-off</b> | <b>Sensitivity</b> | <b>Specificity</b> | <b>Prevalence of grade-IV</b>  | <b>PPV</b>  | <b>NPV</b>  |
| Weber, M A. et al.; 2006 | 6                                 | rTBFmean              | 1.6            | 0.94               | 0.78               | 0.80                           | 94.32       | 76.97       |
| Yang, X. et al.; 2016    | 11, (multiple TIs), (astrocytoma) | rTBFmean              | 4              | 1                  | 0.87               | 0.46                           | 86.96       | 100         |
|                          | 11, (single TI), (astrocytoma)    | rTBFmean              | 3.01           | 0.67               | 0.87               | 0.46                           | 81.71       | 75.26       |
| <b>III vs IV gliomas</b> |                                   |                       |                |                    |                    |                                |             |             |
| <b>Author/year</b>       | <b>Study No.</b>                  | <b>ASL parameters</b> | <b>Cut-off</b> | <b>Sensitivity</b> | <b>Specificity</b> | <b>Prevalence of grade-IV</b>  | <b>PPV</b>  | <b>NPV</b>  |
| Weber, M A. et al.; 2006 | 6                                 | rTBFmean              | 1.4            | 0.97               | 0.5                | 0.76                           | 86.06       | 83.97       |
|                          | 7                                 | rTBFmean              | 2.562          | 0.87               | 0.77               | 0.65                           | 87.37       | 75.42       |
|                          |                                   | rTBFmax               | 2.845          | 0.87               | 0.82               | 0.65                           | 90.23       | 76.77       |
| Fudaba, H. et al.; 2014  |                                   | rTBFmin               | 2.017          | 0.87               | 0.59               | 0.652173913                    | 79.78038157 | 70.21943574 |
|                          | 7, (astrocytoma)                  | rTBFmean              | 1.857          | 0.93               | 0.83               | 0.82                           | 96.29       | 71.54       |
|                          | 7, (astrocytoma)                  | rTBFmax               | 2.258          | 0.93               | 0.83               | 0.82                           | 96.29       | 71.54       |
|                          | 7, (astrocytoma)                  | rTBFmin               | 2.164          | 0.79               | 0.83               | 0.824                          | 95.645      | 45.478      |
| Yang, X. et al.; 2016    | 11, (multiple TIs), (astrocytoma) | rTBFmean              | 8.55           | 0.77               | 0.73               | 0.464                          | 71.19       | 78.55       |
|                          | 11, (single TI), (astrocytoma)    | rTBFmean              | 6.64           | 0.46               | 0.73               | 0.464                          | 59.62       | 60.93       |

**Supplementary Table 5: Sensitivity, specificity, negative predictive values (NPV) and positive predictive values (PPV) of published ASL-derived biomarkers cut-off values between HGGs and LGGs**

| HGG vs LGG               |                                               |                    |         |             |             |            |         |        |
|--------------------------|-----------------------------------------------|--------------------|---------|-------------|-------------|------------|---------|--------|
| Author/ year             | Study No.                                     | ASL parameter      | Cut-off | Sensitivity | Specificity | prevalence | PPV     | NPV    |
| Kim, H.S. et al.; 2007   | 5                                             | rTBFmean           | 1.24    | 0.955       | 0.818       | 0.667      | 91.30   | 90.088 |
|                          | 7                                             | rTBFmean           | 2.562   | 0.652       | 0.778       | 0.719      | 88.243  | 46.661 |
|                          | 7                                             | rTBFmax            | 2.845   | 0.609       | 0.778       | 0.719      | 87.516  | 43.776 |
| Fudaba, H. et al.; 2014  | 7                                             | rTBFmin            | 2.017   | 0.739       | 0.667       | 0.719      | 85.0105 | 50     |
|                          | 7, (astrocytoma)                              | rTBFmean           | 1.8     | 0.824       | 0.667       | 0.85       | 93.343  | 40.076 |
|                          | 7, (astrocytoma)                              | rTBFmax            | 2.258   | 0.765       | 0.667       | 0.85       | 92.866  | 33.372 |
|                          | 7, (astrocytoma)                              | rTBFmin            | 1.254   | 0.882       | 0.667       | 0.85       | 93.753  | 49.937 |
| Shen, N. et al.; 2016    | 9                                             | TBFmax             | 52.21   | 0.889       | 0.826       | 0.5192     | 84.664  | 87.317 |
|                          | 9                                             | rTBFmax            | 1.32    | 0.926       | 0.957       | 0.519      | 95.831  | 92.279 |
|                          | 11, (multiple TIs), (astrocytoma)             | rTBFmean           | 2.43    | 1           | 0.54        | 0.6511     | 80.229  | 100    |
| Yang, X. et al.; 2016    | 11, (single TI), (astrocytoma)                | rTBFmean           | 3.01    | 0.6         | 0.88        | 0.651      | 90.323  | 54.098 |
|                          | 11, (bolus arrival time (BAT)), (astrocytoma) |                    | 0.97    | 0.71        | 0.88        | 0.651      | 91.697  | 61.914 |
| Furtner, J. et al.; 2014 | 12                                            |                    | 1.48    | 0.85        | 1           | 0.788      | 100     | 64.220 |
| Cebeci, H. et al.; 2014  | 13                                            | rTBFmax            | 2.1     | 1           | 0.92        | 0.606      | 95.057  | 100    |
|                          | 13                                            | rSI <sub>max</sub> | 2.19    | 1           | 0.92        | 0.606      | 95.057  | 100    |
| Kim, M.J. et al.; 2008   | 14, (astrocytoma)                             | rTBFmax            | 1.28    | 0.829       | 0.962       | 0.5738     | 96.707  | 80.691 |
| Canale, S. et al.; 2011  | 16, (oligodendroglioma)                       | rTBFmean           | 1.8     | 0.88        | 0.6         | 0.762      | 87.562  | 60.976 |



## REFERENCES

1. Roy B, Awasthi R, Bindal A, Sahoo P, Kumar R, Behari S, Ojha BK, Husain N, Pandey CM, Rathore RK, Gupta RK. Comparative evaluation of 3-dimensional pseudocontinuous arterial spin labeling with dynamic contrast-enhanced perfusion magnetic resonance imaging in grading of human glioma. *J Comput Assist Tomogr.* 2013; 37:321–6. <https://doi.org/10.1097/RCT.0b013e318282d7e2>.
2. Bai Y, Lin Y, Zhang W, Kong L, Wang L, Zuo P, Vallines I, Schmitt B, Tian J, Song X, Zhou J, Wang M. Noninvasive amide proton transfer magnetic resonance imaging in evaluating the grading and cellularity of gliomas. *Oncotarget.* 2017; 8:5834–5842. <https://doi.org/10.18632/oncotarget.13970>.
3. Shen N, Zhao L, Jiang J, Jiang R, Su C, Zhang S, Tang X, Zhu W. Intravoxel incoherent motion diffusion-weighted imaging analysis of diffusion and microperfusion in grading gliomas and comparison with arterial spin labeling for evaluation of tumor perfusion. *Journal of Magnetic Resonance Imaging.* 2016. 620–32. <https://doi.org/10.1002/jmri.25191>.
4. Lin Y, Li J, Zhang Z, Xu Q, Zhou Z, Zhang Z, Zhang Y, Zhang Z. Comparison of intravoxel incoherent motion diffusion-weighted MR imaging and arterial spin labeling MR imaging in gliomas. *Biomed Res Int.* 2015; 2015:234245. <https://doi.org/10.1155/2015/234245>.
5. Gao F, Guo R, Hu XJ, Li CJ, Li M. Noninvasive Tumor Grading of Glioblastomas Before Surgery Using Arterial Spin Labeling. A Cohort Study. *Anal Quant Cytopathol Histopathol.* 2015; 37:339–46.
6. Wolf RL, Wang J, Wang S, Melhem ER, O'Rourke DM, Judy KD, Detre JA. Grading of CNS neoplasms using continuous arterial spin labeled perfusion MR imaging at 3 Tesla. *J Magn Reson Imaging.* 2005; 22:475–82. <https://doi.org/10.1002/jmri.20415>.
7. Chawla S, Wang S, Wolf RL, Woo JH, Wang J, O'Rourke DM, Judy KD, Grady MS, Melhem ER, Poptani H. Arterial spin-labeling and MR spectroscopy in the differentiation of gliomas. *Am J Neuroradiol.* 2007; 28:1683–9. <https://doi.org/10.3174/ajnr.A0673>.
8. Canale S, Rodrigo S, Tourdias T, Mellerio C, Perrin M, Souillard R, Oppenheim C, Meder JF. [Grading of adults primitive glial neoplasms using arterial spin-labeled perfusion MR imaging]. [Article in French]. *J Neuroradiol.* 2011; 38:207–13. <https://doi.org/10.1016/j.neurad.2010.12.003>.
9. Brendle C, Hempel JM, Schittenhelm J, Skardelly M, Tabatabai G, Bender B, Ernemann U, Klose U. Glioma Grading and Determination of IDH Mutation Status and ATRX loss by DCE and ASL Perfusion. *Clinical Neuroradiology.* 2017. <https://doi.org/10.1007/s00062-017-0590-z>.
10. Kim HS, Kim SY. A prospective study on the added value of pulsed arterial spin-labeling and apparent diffusion coefficients in the grading of gliomas. *Am J Neuroradiol.* 2007; 28:1693–9. <https://doi.org/10.3174/ajnr.A0674>.
11. Weber MA, Zoubaa S, Schlieter M, Juttler E, Huttner HB, Geletneky K, Ittrich C, Lichy MP, Kroll A, Debus J, Giesel FL, Hartmann M, Essig M. Diagnostic performance of spectroscopic and perfusion MRI for distinction of brain tumors. *Neurology.* 2006; 66:1899–906. <https://doi.org/10.1212/01.wnl.0000219767.49705.9c>.
12. Fudaba H, Shimomura T, Abe T, Matsuta H, Momii Y, Sugita K, Ooba H, Kamida T, Hikawa T, Fujiki M. Comparison of multiple parameters obtained on 3T pulsed arterial spin-labeling, diffusion tensor imaging, and MRS and the Ki-67 labeling index in evaluating glioma grading. *AJNR Am J Neuroradiol.* 2014; 35:2091–8. <https://doi.org/10.3174/ajnr.A4018>.
13. Yang XS, Zhao B, Wang G, Xiang J, Xu S, Liu Y, Zhao P, Pfeuffer J, Qian T. Improving the grading accuracy of astrocytic neoplasms noninvasively by combining timing information with cerebral blood flow: A multi-Ti arterial spin-labeling MR imaging study. *AJNR Am J Neuroradiol.* 2016; 37:2209–16. <https://doi.org/10.3174/ajnr.A4907>.
14. Furtner J, Schöpf V, Schewzow K, Kasprian G, Weber M, Woitek R, Asenbaum U, Preusser M, Marosi C, Hainfellner JA, Widhalm G, Wolfsberger S, Prayer D. Arterial spin-labeling assessment of normalized vascular intratumoral signal intensity as a predictor of histologic grade of astrocytic neoplasms. *AJNR Am J Neuroradiol.* 2014; 35:482–9. <https://doi.org/10.3174/ajnr.A3705>.
15. Cebeci H, Aydin O, Ozturk-Isik E, Gumus C, Inecikli F, Bekar A, Kocaeli H, Hakyemez B. Assessment of perfusion in glial tumors with arterial spin labeling; comparison with dynamic susceptibility contrast method. *Eur J Radiol.* 2014; 83:1914–9. <https://doi.org/10.1016/j.ejrad.2014.07.002>.
16. Kim MJ, Kim HS, Kim JH, Cho KG, Kim SY. Diagnostic accuracy and interobserver variability of pulsed arterial spin labeling for glioma grading. *Acta Radiol.* 2008; 49:450–7. <https://doi.org/10.1080/02841850701881820>.
17. van Westen D, Petersen ET, Wirestam R, Siemund R, Bloch KM, Ståhlberg F, Björkman-Burtscher IM, Knutsson L. Correlation between arterial blood volume obtained by arterial spin labelling and cerebral blood volume in intracranial tumours. *MAGMA.* 2011; 24:211–23. <https://doi.org/10.1007/s10334-011-0255-x>.
18. Warmuth C, Günther M, Zimmer C. Quantification of Blood Flow in Brain Tumors: Comparison of Arterial Spin Labeling and Dynamic Susceptibility-weighted Contrast-enhanced MR Imaging. *Radiology.* 2003; 228:523–32. <https://doi.org/10.1148/radiol.2282020409>.
